## Correction: Time to Organize the Bioinformatics Resourceome

Nicola Cannata, Emanuela Merelli, Russ B. Altman

DOI: 10.1371/journal.pcbi.0010076

In *PLoS Computational Biology*, volume 1, issue 7.

Two quotes and reference citations were omitted in error:

“More information needs to be in a form that the machine can ‘understand’ rather than simply display” —T. Berners-Lee and J. Hendler [7]

“We invite the life science communities to participate together and begin realizing the semantic Web vision.”  
—E. Neumann [12]

This correction note may be found online at DOI: 10.1371/journal.pcbi.0020020.

Published February 24, 2006

Citation: Cannata N, Merelli E, Altman RB (2006) Correction: Time to organize the bioinformatics resourceome. *PLoS Comput Biol* 2(2): e20.
